# Supplementary material
Source: PubMed Central journal article supplement (PMC6341492)
Supplement: NIHMS994265-supplement-1.pdf [file NIHMS994265-supplement-1.pdf]

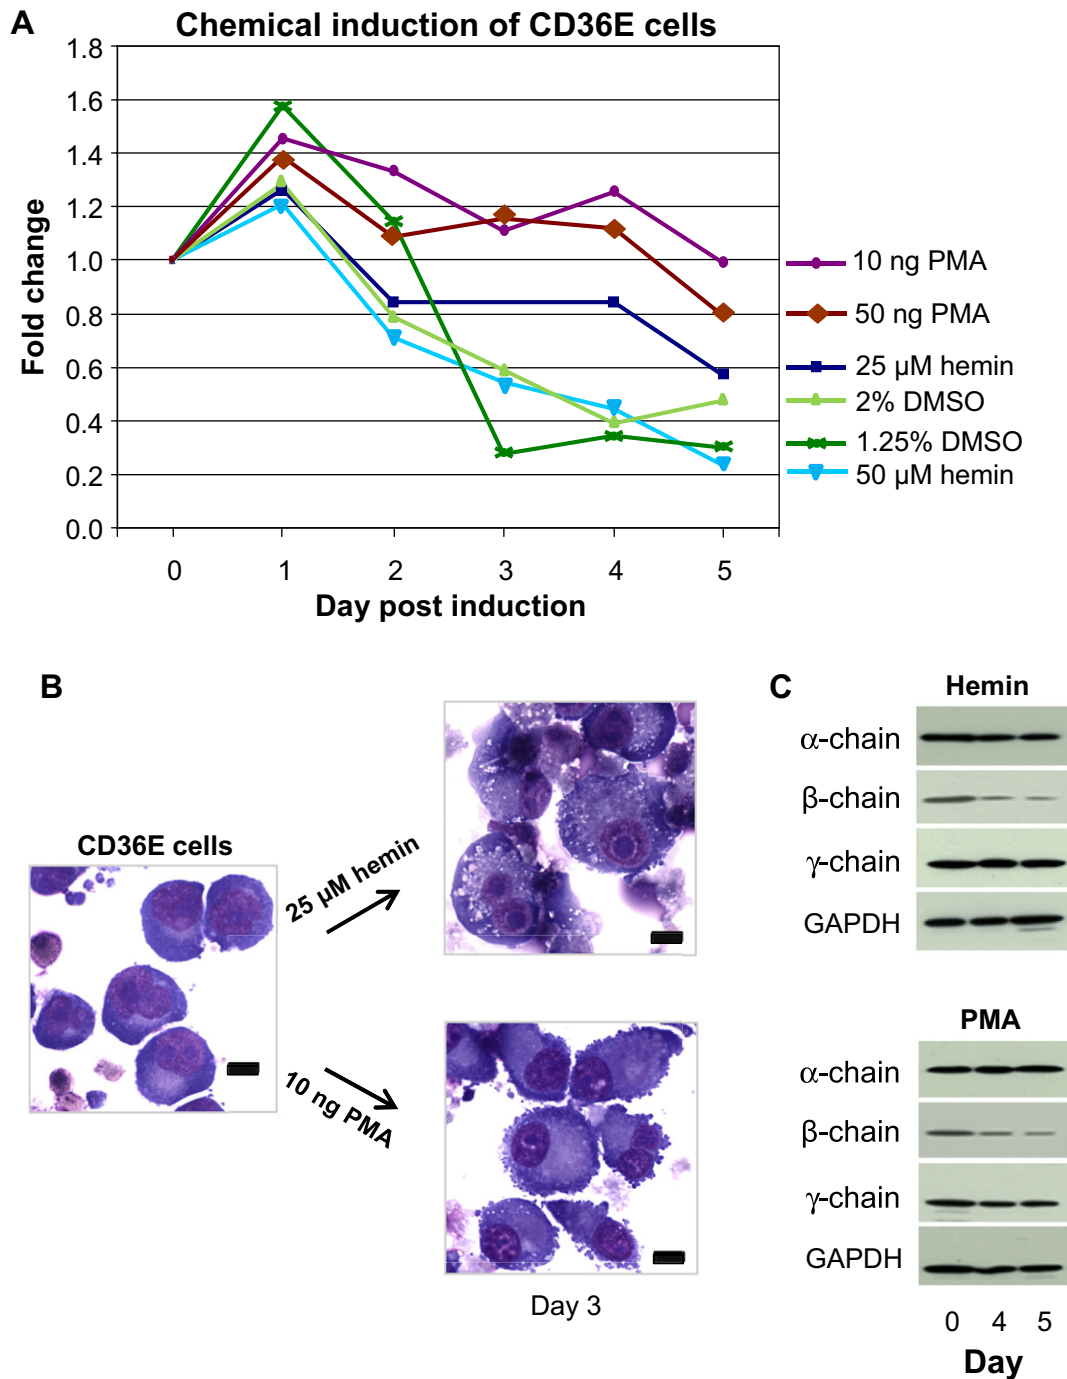

**Supplementary Figure E1.** Induction of CD36E cells with hemin, DMSO, or PMA. CD36E cells were cultured in the serum-free expansion medium containing hemin, DMSO, or PMA at indicated concentrations. (A) Cell proliferation was measured in triplicate by Trypan blue staining at indicated time points. DMSO (1.25% and 2%) and 50 μM hemin were cytotoxic to CD36E cells, leading to rapid cell death, while 25 μM hemin was less toxic. PMA (10 ng/mL and 50 ng/mL) also inhibited CD36E proliferation but was less toxic compared with DMSO and hemin. (B) Day 3 cells cultured with 25 μM hemin or 10 ng/mL PMA were stained with Wright-Giemsa and analyzed by microscopy at 63× magnification, showing cells were filled with vacuoles. Scale bars: 10 μm. (C) Whole cell lysates were prepared from hemin- (25 μM) or PMA- (10 ng) treated CD36E cells on days 4 and 5, followed by immunoblotting using antibodies against globin chains ( $\alpha$ ,  $\beta$ , and  $\gamma$ ) and glyceraldehyde phosphate dehydrogenase (an internal control). The results showed a substantial decrease in  $\beta$ -chain expression in the cells as compared with cells at day 0, but no such difference was observed for  $\alpha$ - and  $\gamma$ -chain expression. Immunoblotting was not performed on cells treated with DMSO, due to the rapid cell death upon treatment.

**Supplementary Table E1.** Fold changes of cell populations in various cytokines and growth factors

|              | Day 1       | Day 2       | Day 3       | Day 4       | Day 5       | Day 6       | Day 7       | Day 8        | Day 9        |
|--------------|-------------|-------------|-------------|-------------|-------------|-------------|-------------|--------------|--------------|
| EPO          | 0.94 ± 0.12 | 0.54 ± 0.12 | 0.55 ± 0.18 | 1.00 ± 0.47 | 0.08 ± 0.06 | 0.00 ± 0.01 |             |              |              |
| SCF+IL-3     | 1.23 ± 0.09 | 0.71 ± 0.03 | 0.51 ± 0.06 | 0.38 ± 0.04 | 0.00 ± 0.01 | 0.00 ± 0.00 |             |              |              |
| SCF          | 0.99 ± 0.08 | 0.78 ± 0.04 | 0.54 ± 0.03 | 0.21 ± 0.06 | 0.02 ± 0.02 | 0.00 ± 0.00 |             |              |              |
| EPO+SCF      | 0.97 ± 0.05 | 1.48 ± 0.26 | 2.44 ± 0.12 | 2.82 ± 0.42 | 3.12 ± 0.37 | 5.47 ± 0.79 | 8.00 ± 1.32 | 11.17 ± 0.32 | 12.42 ± 0.38 |
| IL-3         | 0.79 ± 0.11 | 0.55 ± 0.11 | 0.43 ± 0.05 | 0.27 ± 0.08 | 0.00 ± 0.01 | 0.01 ± 0.02 |             |              |              |
| EPO+IL-3     | 0.89 ± 0.11 | 0.66 ± 0.10 | 0.44 ± 0.06 | 0.21 ± 0.04 | 0.04 ± 0.01 | 0.00 ± 0.00 |             |              |              |
| TPO          | 0.94 ± 0.18 | 0.57 ± 0.13 | 0.42 ± 0.01 | 0.27 ± 0.12 | 0.03 ± 0.03 | 0.00 ± 0.00 |             |              |              |
| EPO+TPO      | 0.82 ± 0.08 | 0.61 ± 0.08 | 0.37 ± 0.13 | 0.34 ± 0.13 | 0.02 ± 0.02 | 0.01 ± 0.02 |             |              |              |
| EPO+SCF+IL-3 | 1.18 ± 0.11 | 1.73 ± 0.30 | 2.96 ± 0.39 | 3.39 ± 0.48 | 4.44 ± 0.86 | 5.48 ± 0.53 | 7.82 ± 0.86 | 10.75 ± 2.09 | 11.54 ± 0.83 |
| None         | 0.67 ± 0.20 | 0.58 ± 0.06 | 0.27 ± 0.03 | 0.33 ± 0.04 | 0.04 ± 0.03 | 0.00 ± 0.00 |             |              |              |

Values are mean ± SD (n = 3).

**Supplementary Table E2.** Fold changes of cell populations in different cytokine concentrations

|                              | Day 1       | Day 2       | Day 3       | Day 4       | Day 5       |
|------------------------------|-------------|-------------|-------------|-------------|-------------|
| 3 IU EPO/mL                  | 1.33 ± 0.12 | 0.80 ± 0.28 | 0.42 ± 0.13 | 0.32 ± 0.15 | 0.23 ± 0.03 |
| 9 IU EPO/mL                  | 0.87 ± 0.26 | 0.50 ± 0.06 | 0.27 ± 0.23 | 0.47 ± 0.09 | 0.36 ± 0.08 |
| 27 IU EPO/mL                 | 0.87 ± 0.47 | 0.64 ± 0.19 | 0.18 ± 0.08 | 0.34 ± 0.08 | 0.17 ± 0.13 |
| 100 ng SCF/mL                | 0.99 ± 0.18 | 1.10 ± 0.10 | 0.29 ± 0.10 | 0.29 ± 0.05 | 0.22 ± 0.05 |
| 300 ng SCF/mL                | 1.25 ± 0.31 | 0.68 ± 0.12 | 0.46 ± 0.13 | 0.29 ± 0.17 | 0.22 ± 0.07 |
| 900 ng SCF/mL                | 1.17 ± 0.23 | 0.84 ± 0.39 | 0.21 ± 0.08 | 0.30 ± 0.06 | 0.60 ± 0.72 |
| 3 IU EPO/mL + 100 ng SCF/mL  | 1.90 ± 0.12 | 1.83 ± 0.26 | 1.81 ± 0.46 | 2.08 ± 0.13 | 2.34 ± 0.95 |
| 9 IU EPO/mL + 300 ng SCF/mL  | 1.69 ± 0.08 | 1.88 ± 0.40 | 1.18 ± 0.32 | 1.43 ± 0.20 | 1.87 ± 0.30 |
| 27 IU EPO/mL + 900 ng SCF/mL | 1.21 ± 0.24 | 1.47 ± 0.20 | 1.37 ± 0.47 | 1.30 ± 0.27 | 1.72 ± 0.55 |

Values are mean ± SD (n = 3).

**Supplementary Table E3.** Fold changes of cell populations in different mitogens

|              | Day 1       | Day 2       | Day 3       | Day 4       | Day 5       |
|--------------|-------------|-------------|-------------|-------------|-------------|
| 25 μM Hemin  | 1.27 ± 0.35 | 0.84 ± 0.19 | 0.84 ± 0.07 | 0.84 ± 0.07 | 0.57 ± 0.30 |
| 50 μM Hemin  | 1.21 ± 0.12 | 0.71 ± 0.05 | 0.54 ± 0.08 | 0.44 ± 0.16 | 0.23 ± 0.03 |
| 1.25% DMSO   | 1.58 ± 0.23 | 1.14 ± 0.19 | 0.28 ± 0.10 | 0.34 ± 0.05 | 0.30 ± 0.23 |
| 2% DMSO      | 1.29 ± 0.29 | 0.79 ± 0.05 | 0.59 ± 0.05 | 0.39 ± 0.13 | 0.48 ± 0.57 |
| 10 ng PMA/mL | 1.46 ± 0.14 | 1.33 ± 0.09 | 1.11 ± 0.02 | 1.25 ± 0.12 | 0.99 ± 0.22 |
| 50 ng PMA/mL | 1.39 ± 0.34 | 1.09 ± 0.12 | 1.16 ± 0.16 | 1.12 ± 0.13 | 0.79 ± 0.86 |

Values are mean ± SD (n = 3).
